# Supplementary material for: The chemical chaperone 4-phenylbutyric acid rescues molecular cell defects of COL3A1 mutations that cause vascular Ehlers Danlos Syndrome
Source: Springer Nature journal article supplement (doi:10.1038/s41420-025-02476-y), 2025-04-25
Supplement: MOESM1 [file 41420_2025_2476_MOESM1_ESM.pdf]

# **The chemical chaperone 4-phenylbutyric acid rescues molecular cell defects of *COL3A1* mutations that cause vascular Ehlers Danlos Syndrome.**

Ramla Omar<sup>1</sup>, Michelle Lee<sup>1</sup>, Laura Gonzalez-Trueba<sup>1</sup>, Cameron R Thomson<sup>1</sup>, Uwe Hansen<sup>2</sup>, Spyridonas Lianos<sup>1</sup>, Snoopy Hazarika<sup>1</sup>, Omar MEH El-Abdallah<sup>1</sup>, Malak, A Ammar<sup>1</sup>, Jennifer Cassels<sup>2</sup>, Alison M. Michie<sup>2</sup>, Neil J Bulleid<sup>3</sup>, Fransiska Malfait<sup>4</sup>, Tom Van Agtmael<sup>1\*</sup>

## **Supplemental Figures**

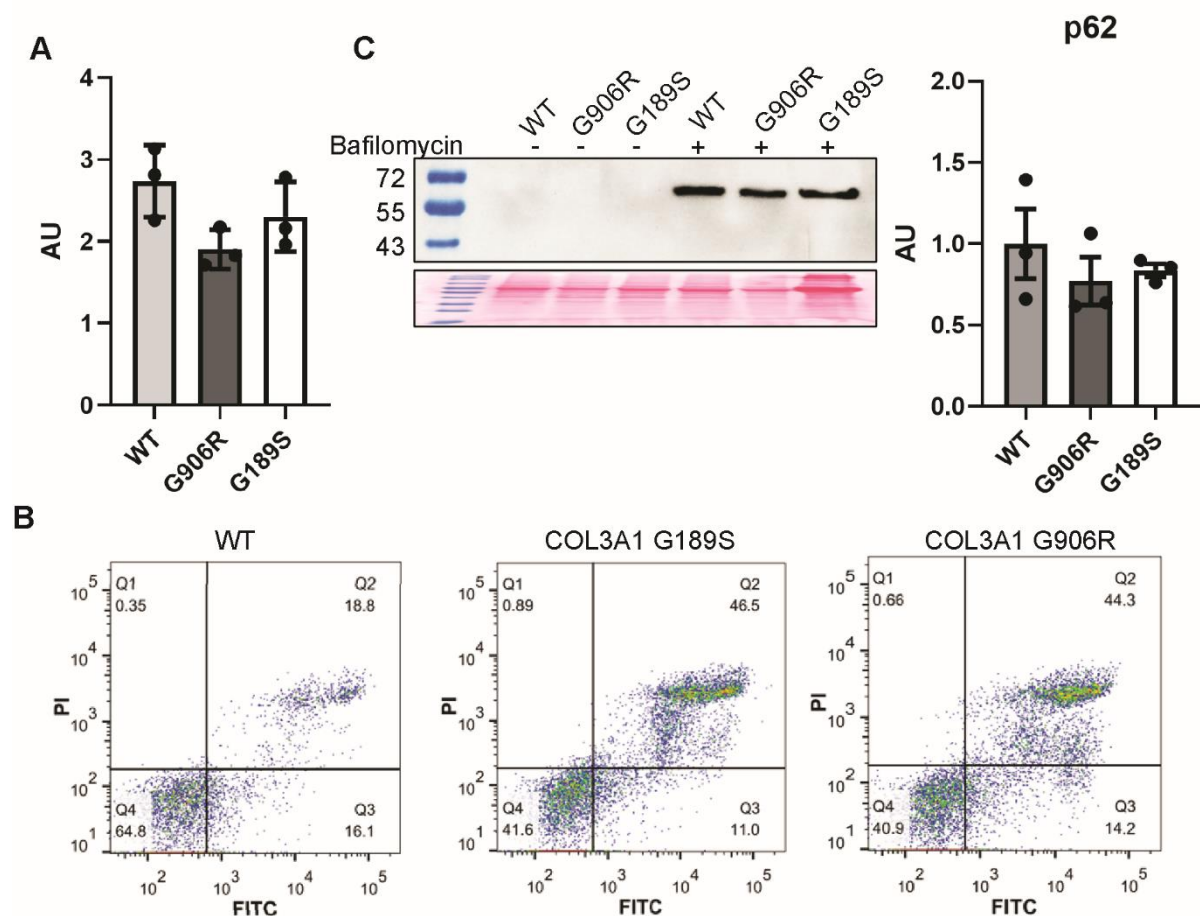

**Supplemental Figure 1.** (A) MTT assay on wild type (WT) cells and *COL3A1*<sup>G189S/+</sup> (*COL3A1* G189S) and *COL3A1*<sup>G906R/+</sup> (*COL3A1* G906R) cells. Data represented as fold increase in signal between 0h and after 72 hours of cell culture (n=3, One Way ANOVA). (B) *COL3A1* mutations induce apoptosis. Scatter plot of FACS data shown in Figure 1 on wild type (WT) cells and *COL3A1*<sup>G189S/+</sup> (*COL3A1* G189S) and *COL3A1*<sup>G906R/+</sup> (*COL3A1* G906R) cells stained with propidium iodide (PI) and annexin V (FITC). (C) Western blotting against p62 on cells in the presence or absence of bafilomycin A1 (inhibitor or autophagic flux)(n=3, One Way ANOVA).

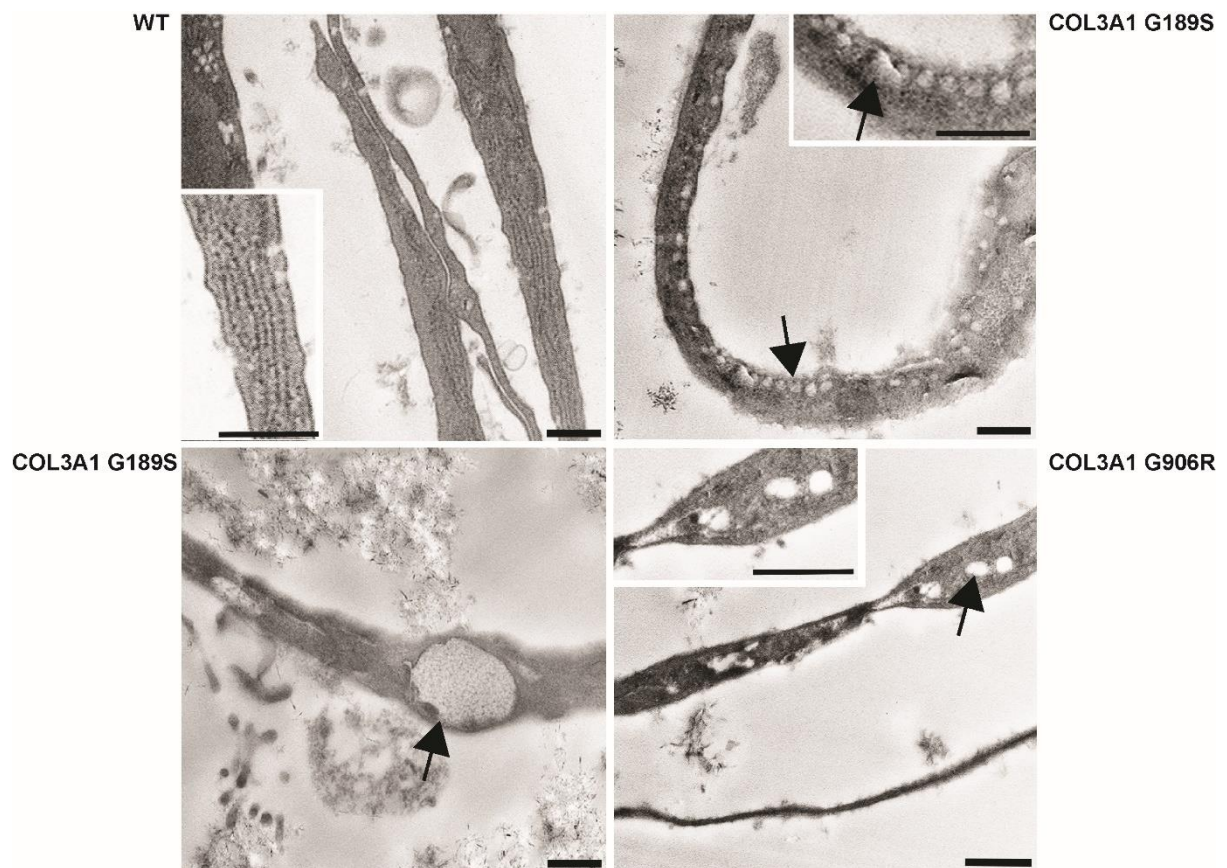

**Supplemental Figure 2. EM analysis.** TEM analysis on wild type (WT) cells and *COL3A1*<sup>G189S/+</sup> (COL3A1 G189S) and *COL3A1*<sup>G906R/+</sup> (COL3A1 G906R) cells. Swollen vesicles, indicating of distended ER, are indicated by black arrows. Size bar 500nm.

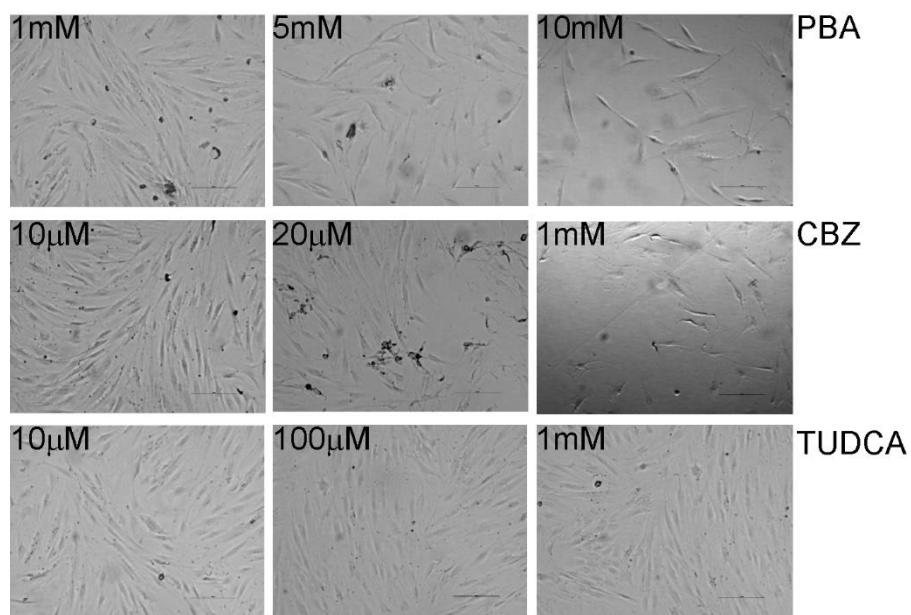

**Supplemental Figure 3. Impact of treatments on cell viability.** Phase contrast Microscopy images of wild type primary dermal fibroblasts incubated for 24 hours with varying concentrations of PBA, TUDCA and CBZ. Scale bar 100  $\mu$ m

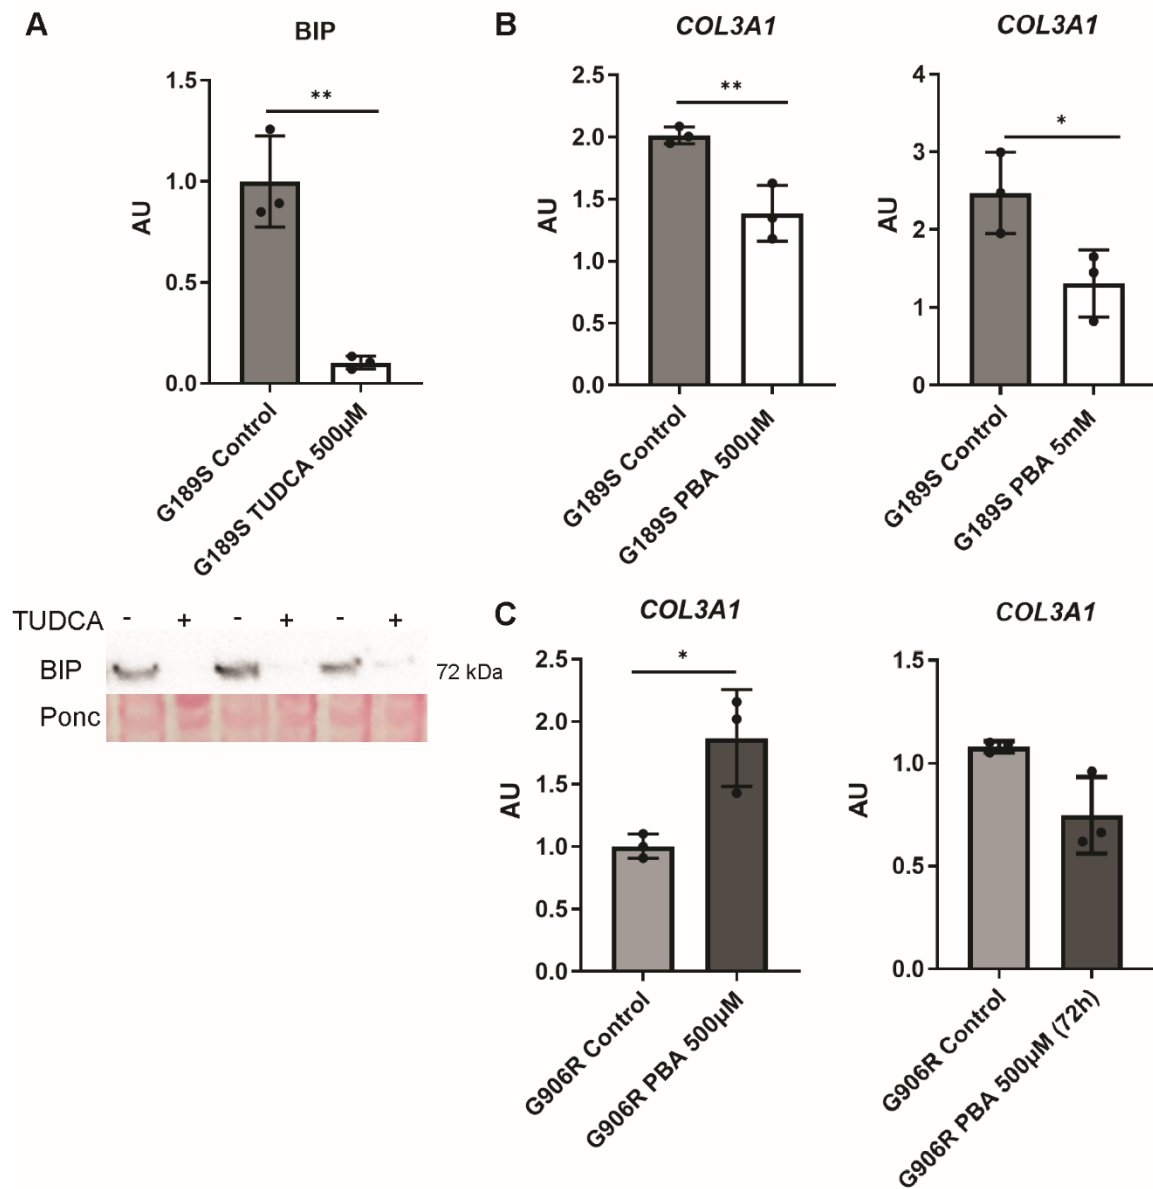

**Supplemental Figure 4. Efficacy of TUDCA on ER stress and PBA on COL3A1 mRNA levels (A)** *COL3A1*<sup>G189S/+</sup> (G189S) cells and cells treated with TUDCA for 24 hours, shows reduced levels of ER stress marker BIP. (B) *COL3A1*<sup>G189S/+</sup> (G189S) cells treated with 0.5 mM or 5mM PBA for 24 hours. (C) *COL3A1*<sup>G906R/+</sup> (G906R) cells treated with 0.5mM PBA for 24 or 72 hours. N=3, unpaired t-test  
\*p<0.05, \*\* p<0.01

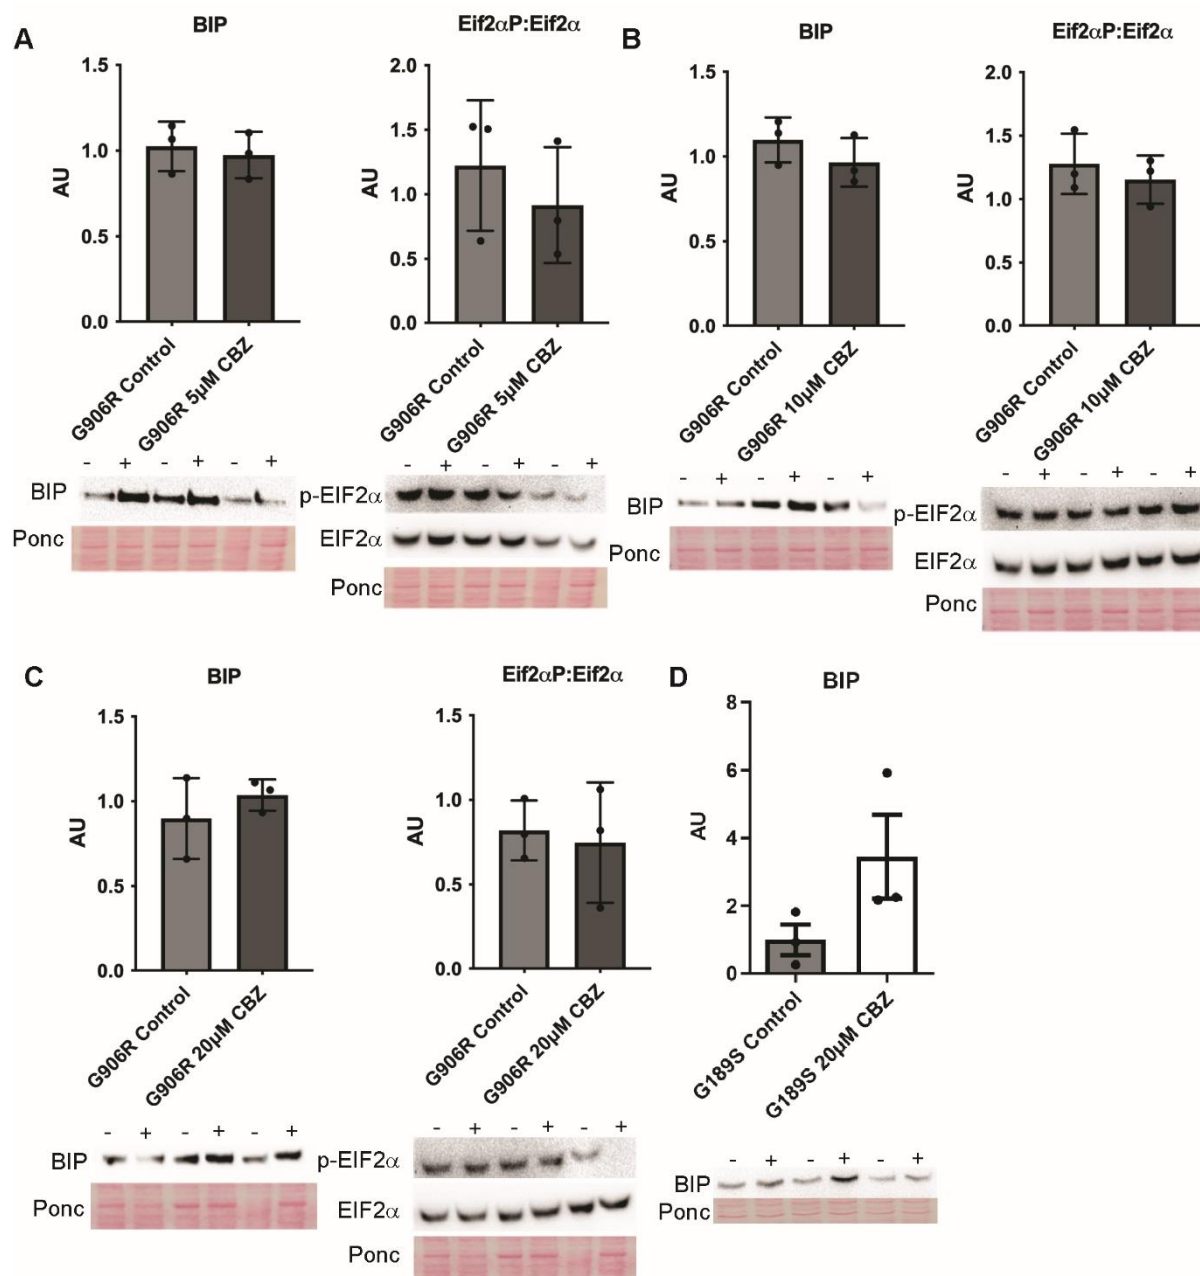

**Supplemental Figure 5. CBZ Treatment does not reduce ER stress levels due to COL3A1 mutations.**

Cells were incubated for 24 hours with CBZ at different concentrations and western blotting was performed to assess protein levels of BIP, phosphorylated EIF2α (p-EIF2α) and total EIF2α as markers of ER stress. Ponceau (Ponc) used as protein loading control. (A) Western blot and graph of densitometry analysis of BIP and ratio of p-EIF2α:EIF2α in *COL3A1*<sup>G906R/+</sup> cells untreated (control) and incubated with 5 μM CBZ. A-D n =3, unpaired t-test (B) Data of incubation with *COL3A1*<sup>G906R/+</sup> cells untreated (control) and incubated with 10 μM CBZ. (C) Data of incubation with *COL3A1*<sup>G906R/+</sup> cells untreated (control) and incubated with 20 μM CBZ. (D) BIP protein levels in *COL3A1*<sup>G189S/+</sup> cells untreated (control) and incubated with 20 μM CBZ.



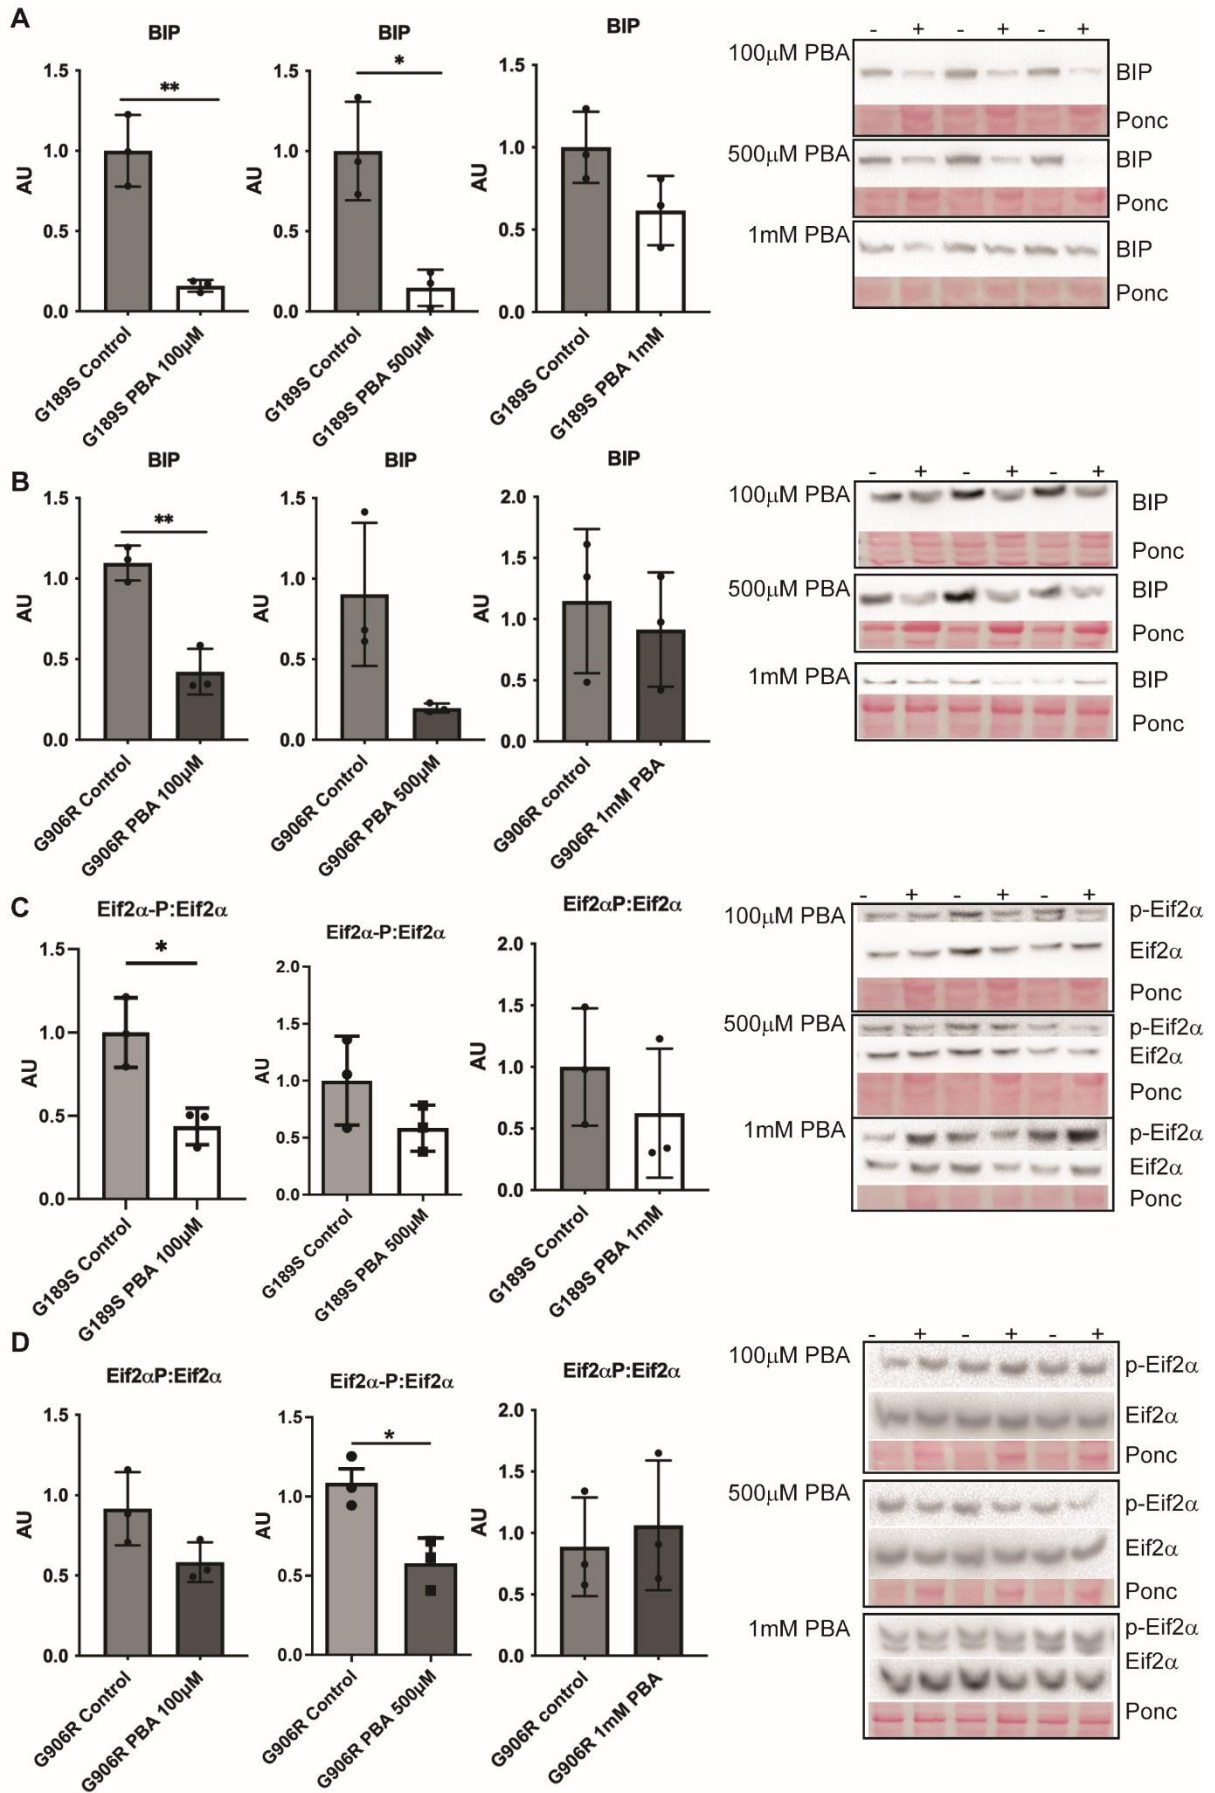

**Supplemental Figure 6. Dosage dependent effects of PBA.** A graphic summary of these data is provided in Figure 4 C-D. (A) BIP protein levels in *COL3A1*<sup>G189S/+</sup> cells treated with PBA for 24 hours compared to untreated cells (control). Western blots are provided on right hand side. (B) BIP protein levels in *COL3A1*<sup>G906R/+</sup> cells treated with PBA for 24 hours compared to untreated cells (control). (C) Ratio of phosphorylated EIF2 $\alpha$  (p-EIF2 $\alpha$ ): total EIF2 $\alpha$  in *COL3A1*<sup>G189S/+</sup> cells treated with PBA compared to untreated cells. (D) Ratio of phosphorylated EIF2 $\alpha$  (p-EIF2 $\alpha$ ): total EIF2 $\alpha$  in *COL3A1*<sup>G906R/+</sup> cells treated with PBA compared to untreated cells. A-D n=3, unpaired t-test \* p<0.05, \*\* p<0.01

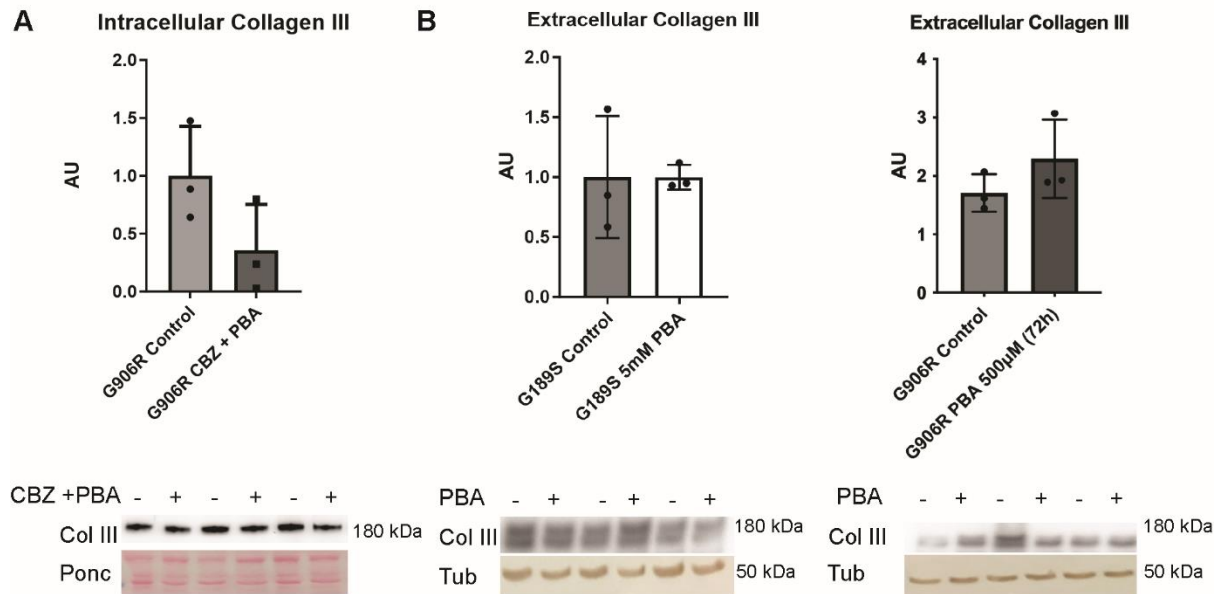

**Supplemental Figure 7. Compound PBA:CBZ treatment and impact of PBA on collagen III secretion.**

(A) Western Blot against intracellular collagen III in COL3A1<sup>G906R/+</sup> cells treated (+) with combinatorial treatment of 500μM PBA and 20μM CBZ for 24 hours. Untreated cells (-, control). No reduction in intracellular collagen III was observed. (n=3, unpaired t-test) (B) Western Blot against collagen III on conditioned media of COL3A1<sup>G189S/+</sup> cells and COL3A1<sup>G906R/+</sup> treated (+) with PBA for 24 and 72 hours respectively. Untreated cells (-). Media was changed for the final 24 hours so conditioned media reflected the amount of collagen III secretion over a 24 hour period. No difference in collagen III secretion was observed. (n=3, unpaired t-test).
